# Supplementary material for: Balance Remains Impaired after Hip Arthroplasty: A Systematic Review and Best Evidence Synthesis
Source: MDPI journal article supplement (doi:10.3390/diagnostics12030684), 2022-03-11
Supplement: s1 [file s1]

**Supplementary Material Table S1** Details of the included studies

| <i>Author</i>     | <i>Patients (f-m)-age-BMI</i> | <i>Study design</i> | <i>Follow-up (months)</i> | <i>Balance definition</i>          | <i>Risk factors</i>                    | <i>Measurement</i>                                                      | <i>Comparison</i>                         |
|-------------------|-------------------------------|---------------------|---------------------------|------------------------------------|----------------------------------------|-------------------------------------------------------------------------|-------------------------------------------|
| Nallegowda 2003   | 30(nr-nr)-nr-nr               | prospective         | 9                         | no                                 | nr                                     | dynamic posturography                                                   | pre-post surgery. Healthy control         |
| Majewski 2005     | 25(11-14)-67-nr               | prospective         | 12-4 months               | Yes: trunk pitch and roll movement | nr                                     | gait,mTUG, stance stand                                                 | pre-post surgery. Healthy control         |
| D'Amico 2006      | 90(nr-nr)-66.5-nr             | prospective         | nr                        | no                                 | nr                                     | nr                                                                      | pre-post surgery. Sperimental control     |
| Giaquinto 2006    | 20(14-6)-70.2-nr              | prospective         | 2weeks                    | no                                 | nr                                     | gait in the water                                                       | pre-post surgery                          |
| Belaid 2007       | 10(4-6)-69.8-nr               | prospective         | 2weeks-1                  | no                                 | nr                                     | platf (CoP), TUG, lateral reach,test, musc strength, 10MWT,FIM,VAS      | pre-post surgery. Leg healthy             |
| Nantel 2007       | 20(9-11)-49-30                | prospective         | 6                         | no                                 | hip resurfacing-THA. 6-8weeks training | postural tasks                                                          | THA controls. Healthy control             |
| Lugade 2008       | 20(6-14)-57-31.9              | prospective         | 1day-6weeks-16w           | no                                 | nr                                     | gait, Harris hip, force platf                                           | pre-post surgery, healthy matched control |
| Calò 2009         | 23(13-10)-64.3-nr             | prospective         | 4                         | no                                 | 4weeks rehabilitation                  | SOT, MCT, AT                                                            | Healthy control                           |
| Nantel 2009       | 10(5-5)-51-28.5               | prospective         | 1day-6                    | no                                 | hip resurfacing-THA.6-8weeks training  | 10MWT, Kynetic analysis, muscle strenght, WOMAC, Merlè d'Aubigné-postel | THA control. Healthy control              |
| Quagliarella 2010 | 81(nr-nr)-64.1-nr             | retrospective       | 12-6 months               | no                                 | nr                                     | platform                                                                | Healthy control                           |

|                  |                   |                 |             |     |                                              |                                                        |                                                                   |
|------------------|-------------------|-----------------|-------------|-----|----------------------------------------------|--------------------------------------------------------|-------------------------------------------------------------------|
| Rasch<br>2010    | 22(18-4)-67-nr    | prospective     | 24-6 months | no  | 10weeks training post-op                     | muscle strength, balance (platf),gait                  | pre-post surgery                                                  |
| Bitterli<br>2011 | 39(19-22)-65.4-nr | prospective RCT | 10day-4-12  | no  | 4w pre-op sensorimotor training              | SF-36,WOMAC,BBS (platf)                                | pre-post surgery. Control no training                             |
| Kiss 2012        | 80(47-33)-71.3-nr | prospective     | 2003/6/12   | no  | direct lateral or anterolateral, BMI         | HHS, gait,                                             | healthy control                                                   |
| Holnapy<br>2013  | 45(36-9)-nr-nr    | prospective     | 6weeks-3-6  | no  | direct lateral or anterolateral or posterior | perturbation platform                                  | pre-post surgery.- other approaches                               |
| Larkin<br>2013   | 100(38-62)-nr-nr  | prospective     | nr          | nr  | hip resurfacing and THA                      | UCLA score, Harris hip, dynamic postural stability     | pre-post surgery, healthy matched control, different intervention |
| Brauner<br>2014  | 61(27-34)-61.8-nr | prospective     | 2weeks      | no  | 2weeks rehabilitation post-op                | interlimb vertical force and dynamic stab during squat | healthy control                                                   |
| Caplan<br>2014   | 14(1-14)-63.8-nr  | prospective     | 12-3 months | no  | hip resurfacing-THA                          | TUG, vertical ground reaction force                    | THA control. Healthy control                                      |
| Jogi 2014        | 26(nr-nr)-64-nr   | prospective RCT | 1 1/2       | no  | 5weeks training e balance train post-op      | Berg Balance, TUG, WOMAC, ABC test                     | no training control                                               |
| Butler<br>2015   | 75(nr-nr)-66.1-31 | retrospective   | 12          | yes | BMI                                          | unilateral stand position                              | control joints replacement                                        |
| Chang<br>2015    | 23(13-10)-60-nr   | prospective     | 2w-6w-3-6   | no  | minimally invasive THA                       | Vas, Berg balance, FIM,A BC, foot placement            | pre-post surgery                                                  |
| Jensen<br>2015   | 38(13-25)-55-27.9 | prospective RCT | 6-2 months  | no  | hip resurfacing-THA                          | gait deviation index                                   | pre-post surgery. THA control. Leg healthy                        |

|                 |                               |                        |                           |                                    |                                         |                                                                |                                        |
|-----------------|-------------------------------|------------------------|---------------------------|------------------------------------|-----------------------------------------|----------------------------------------------------------------|----------------------------------------|
| Jogi 2015       | 63(41-22)-67-nr               | prospective RCT        | 6weeks                    | no                                 | 5weeks training e balance train post-op | platform (ellipse area)                                        | no training control                    |
| Zeng 2015       | 59(28-31)-64-26.7             | prospective random     | 6-3 months                | no                                 | 12weeks training post-op                | WOMAC,6MWT,TUG,UPST, ROM                                       | no training control                    |
| Jo 2016         | 31(11-20)-65.4-nr             | retrospective          | 3                         | no                                 | nr                                      | Berg balance, JPS, QOL, sf-36. (Proprioception) muscle mass    | pre-post surgery                       |
| Esposito 2017   | 30(nr-nr)-69-28               | prospective randomized | 3days                     | no                                 | crutches set-up post-op                 | VAS, Oxford hip score, platform                                | set up group                           |
| Ninomiya 2017   | 58(48-10)-68-22               | retrospective          | 120                       | no                                 | nr                                      | muscle strength, single limb stance time, MWS, fall rate, IPAQ | healthy control                        |
| Pop 2018        | 55(31-24)-56-nr               | prospective            | 24-36                     | no                                 | 4weeks rehabilitation. Female           | platform (stabilometric), romberg                              | healthy control                        |
| <b>Author</b>   | <b>Patients (f-m)-age-BMI</b> | <b>Study design</b>    | <b>Follow-up (months)</b> | <b>Balance definition</b>          | <b>Risk factors</b>                     | <b>Measurement</b>                                             | <b>Comparison</b>                      |
| Nallegowda 2003 | 30(nr-nr)-nr-nr               | prospective            | 9                         | no                                 | nr                                      | dynamic posturography                                          | pre-post surgery. Healthy control      |
| Majewski 2005   | 25(11-14)-67-nr               | prospective            | 12-4 months               | Yes: trunk pitch and roll movement | nr                                      | gait,mTUG, stance stand                                        | pre-post surgery. Healthy control      |
| D'Amico 2006    | 90(nr-nr)-66.5-nr             | prospective            | nr                        | no                                 | nr                                      | nr                                                             | pre-post surgery. Experimental control |
| Giaquinto 2006  | 20(14-6)-70.2-nr              | prospective            | 2weeks                    | no                                 | nr                                      | gait in the water                                              | pre-post surgery                       |

|                   |                   |                 |                 |    |                                              |                                                                         |                                                                   |
|-------------------|-------------------|-----------------|-----------------|----|----------------------------------------------|-------------------------------------------------------------------------|-------------------------------------------------------------------|
| Belaid 2007       | 10(4-6)-69.8-nr   | prospective     | 2weeks-1        | no | nr                                           | platf (CoP), TUG, lateral reach,test, musc strength, 10MWT,FIM,VAS      | pre-post surgery. Leg healthy                                     |
| Nantel 2007       | 20(9-11)-49-30    | prospective     | 6               | no | hip resurfacing-THA. 6-8weeks training       | postural tasks                                                          | THA controls. Healthy control                                     |
| Lugade 2008       | 20(6-14)-57-31.9  | prospective     | 1day-6weeks-16w | no | nr                                           | gait, Harris hip, force platf                                           | pre-post surgery, healthy matched control                         |
| Calò 2009         | 23(13-10)-64.3-nr | prospective     | 4               | no | 4weeks rehabilitation                        | SOT, MCT, AT                                                            | Healthy control                                                   |
| Nantel 2009       | 10(5-5)-51-28.5   | prospective     | 1day-6          | no | hip resurfacing-THA.6-8weeks training        | 10MWT, Kynetic analysis, muscle strenght, WOMAC, Merlè d'Aubigné-postel | THA control. Healthy control                                      |
| Quagliarella 2010 | 81(nr-nr)-64.1-nr | retrospective   | 12-6 months     | no | nr                                           | platform                                                                | Healthy control                                                   |
| Rasch 2010        | 22(18-4)-67-nr    | prospective     | 24-6 months     | no | 10weeks training post-op                     | muscle strength, balance (platf),gait                                   | pre-post surgery                                                  |
| Bitterli 2011     | 39(19-22)-65.4-nr | prospective RCT | 10day-4-12      | no | 4w pre-op sensorimotor training              | SF-36,WOMAC,BBS (platf)                                                 | pre-post surgery. Control no training                             |
| Kiss 2012         | 80(47-33)-71.3-nr | prospective     | 2003/6/12       | no | direct lateral or anterolateral, BMI         | HHS, gait,                                                              | healthy control                                                   |
| Holnapy 2013      | 45(36-9)-nr-nr    | prospective     | 6weeks-3-6      | no | direct lateral or anterolateral or posterior | perturbation platform                                                   | pre-post surgery.- other approaches                               |
| Larkin 2013       | 100(38-62)-nr-nr  | prospective     | nr              | nr | hip resurfacing and THA                      | UCLA score, Harris hip, dynamic postural stability                      | pre-post surgery, healthy matched control, different intervention |

|                  |                           |                               |                |     |                                                      |                                                                      |                                                           |
|------------------|---------------------------|-------------------------------|----------------|-----|------------------------------------------------------|----------------------------------------------------------------------|-----------------------------------------------------------|
| Brauner<br>2014  | 61(27-34)-<br>61.8-nr     | prospective                   | 2weeks         | no  | 2weeks<br>rehabilitati<br>on post-op                 | interlimb vertical force and<br>dynamic stab during squat            | healthy<br>control                                        |
| Caplan<br>2014   | 14(1-14)-<br>63.8-nr      | prospective                   | 12-3<br>months | no  | hip<br>resurfacing-<br>THA                           | TUG, vertical ground<br>reaction force                               | THA<br>control.<br>Healthy<br>control                     |
| Jogi 2014        | 26(nr-<br>nr)-64-<br>nr   | prospective<br>RCT            | 1 1/2          | no  | 5weeks<br>training e<br>balance<br>train post-<br>op | Berg Balance, TUG,<br>WOMAC, ABC test                                | no<br>training<br>control                                 |
| Butler<br>2015   | 75(nr-<br>nr)-<br>66.1-31 | retrospecti<br>ve             | 12             | yes | BMI                                                  | unilateral stand position                                            | control<br>joints<br>replaceme<br>nt                      |
| Chang<br>2015    | 23(13-<br>10)-60-<br>nr   | prospective                   | 2w-6w-<br>3-6  | no  | minimally<br>invasive<br>THA                         | Vas, Berg balance, FIM,A BC,<br>foot placement                       | pre-post<br>surgery                                       |
| Jensen<br>2015   | 38(13-<br>25)-55-<br>27.9 | prospective<br>RCT            | 6-2<br>months  | no  | hip<br>resurfacing-<br>THA                           | gait deviation index                                                 | pre-post<br>surgery.<br>THA<br>control.<br>Leg<br>healthy |
| Jogi 2015        | 63(41-<br>22)-67-<br>nr   | prospective<br>RCT            | 6weeks         | no  | 5weeks<br>training e<br>balance<br>train post-<br>op | platform (ellipse area)                                              | no<br>training<br>control                                 |
| Zeng 2015        | 59(28-<br>31)-64-<br>26.7 | prospective<br>random         | 6-3<br>months  | no  | 12weeks<br>training<br>post-op                       | WOMAC,6MWT,TUG,UPST,<br>ROM                                          | no<br>training<br>control                                 |
| Jo 2016          | 31(11-<br>20)-<br>65.4-nr | retrospecti<br>ve             | 3              | no  | nr                                                   | Berg balance, JPS, QOL, sf-36.<br>(Proprioception) muscle mass       | pre-post<br>surgery                                       |
| Esposito<br>2017 | 30(nr-<br>nr)-69-<br>28   | prospective<br>randomize<br>d | 3days          | no  | crutches<br>set-up post-<br>op                       | VAS, Oxford hip score,<br>platform                                   | set up<br>group                                           |
| Ninomiya<br>2017 | 58(48-<br>10)-68-<br>22   | retrospecti<br>ve             | 120            | no  | nr                                                   | muscle strength, single limb<br>stance time, MWS, fall rate,<br>IPAQ | healthy<br>control                                        |

|          |                 |             |       |    |                               |                                   |                 |
|----------|-----------------|-------------|-------|----|-------------------------------|-----------------------------------|-----------------|
| Pop 2018 | 55(31-24)-56-nr | prospective | 24-36 | no | 4weeks rehabilitation. Female | platform (stabilometric), romberg | healthy control |
|----------|-----------------|-------------|-------|----|-------------------------------|-----------------------------------|-----------------|
